# Supplementary material for: The effect of scutellaria baicalensis and its active ingredients on major depressive disorder: a systematic review and meta-analysis of literature in pre-clinical research
Source: Front Pharmacol. 2024 Mar 20;15:1313871. doi: 10.3389/fphar.2024.1313871 (PMC10987764; doi:10.3389/fphar.2024.1313871)
Supplement: Supplementary file 1 [file Table1.xls]

## Sheet: Sheet1
Study	Intervention	Depression model	Animal Species	anesthetic	Weigh	Experimental group	Control group	administration route	Outcome	Intergroup difference	Time of administration	Positive drug control
Jia,2021[13]	Baicalin	CUMS	ICR mice（male，10/10）	—	22-26g	Baicalin（25、50 mg/kg/d）for 3W+CUMS for 6W	Saline+CUMS for 6w	intragastric	（1）Behavioral test:SPT，OFT,MWM, TST, NSF；（2）Body weight↑；（3）hippocampus：a、p-ERK/ERK↑、 p-CREB/CREB↑，b、 real-time PCR： ERK mRNA↑、CREB mRNA↑，c、immunofluorescence in the CA1、CA3 and DG： p-ERK↑ 、p-CREB↑	p＜0.05	—	Fluoxetine,10 mg/kg
Zhao，2021[14]	Baicalein	rotenone-induced mice model	C57BL/6J mice（male，10/12）	—	20-22g	Baicalein（300mg/kg/d）for 4W+rotenone-induced for 2W	Saline+rotenone-induced for 2W	intragastric	（1）Behavioral test:SPT↑，OFT↑,RT↑, TST↓；（2）striatum：α-synuclein↓；（3）neuroinflammation：a、midbrain：IFN-γ↓,IL-4↓,IL-12↓,IL-6↓，b、plasma： IL-1β↓，IL-4↓，IL-5↓，IL-10↓，IL-12↓；（4）monoamine neurotransmitters：a、 cortex：DA↑、 DOPAC↑、HVA↑、5-HT↑、5-HIAA↑、NE↑， b、striatum：DA↑、 DOPAC↑、HVA↑、5-HT↑，c、 brain stem：NE↑、5-HT↑；（5）BDNF/ TrkB/CREB pathway in the hippocampus：PSD95↓、SYP↓，BDNF↑、TrkB↑、CREB↑，PI3K↓、Akt↓、CaMK II↓	p<0.05, p<0.01	—	madopar,50 mg/kg
Zhao,2020[15]	Baicalin	CORT	C57BL/6J mice（female，10/10）	—	18-22g	Baicalin（30、60mg/kg/d）for 6W+CORT for 3W	Saline+CORT for 3W	intragastric	（1）Behavioral test:SPT↑，OFT↑，FST↓, TST↓， NSF↑；（2）Hippocampal dentate gyrus：Ki-67 positive cells↑， BrdU cells↑， DCX+/NeuN+/BrdU+ cells↑， DCX-/NeuN+/BrdU+ cells↑；（3） PI3K/AKT/GSK3b/b-catenin pathway： p-PI3K↑, p-AKT↑, p-GSK-3b↑ ，b-catenin↑，PSD95↑ ，Synaptophysin 1↑	p＜0.05	30minprior to the corticosterone injection	Escitalopram,10 mg/kg
Zhang，2019a[16]	Baicalin	CORT，40 mg/kg	C57BL/6 male（male，15/15）	—	18-22g	Baicalin（40、80、160mg/kg/d）for 4W+CORT for 8W	CORT for 8W	intragastric	（1）Behavioral test:FST↓, TST↓，elevated plus maze test↑；（2）DEX-induced corticosterone suppression↑；（3）nuclear GR↓， cytoplasmic pGR S203↓，cytoplasmic pGR S211↓	p<0.05, p<0.01	30minprior to the corticosterone injection	Fluoxetine,18 mg/kg
Zhang，2019b[17]	Baicalin	CUMS	ICR mice（male，10/10）	—	23-26g	Baicalin（60 mg/kg/d）for 3W+CUMS for 6W	Saline+CUMS for 6w	intragastric	（1）Behavioral test:SPT↑，OFT↑,TST↓；（2）dendritic morphology and hippocampal neurogenesis：DCX+ cells↑， dendritic intersections of neurons in the DG↑，the AOD of BrdU+/NeuN+↑；（3）Akt/FOXG1 pathway：p-Akt/Akt↑, FOXG1↑，FGF2↑	p＜0.01	—	Fluoxetine,15 mg/kg
Zhang，2018[18]	Radix Scutellariae	CUMS	SD rats（male，10/10）	—	190-220g	Radix Scutellariae（500、1000 mg/kg/d）for 3W+CUMS for 6W	CUMS for 6W	intragastric	（1）Behavioral test:SPT↑，OFT↑,FST↓，MWM↑；（2）hippocampus dentate gyrus：Brdu+↑，DCX+↑，NeuN+↑，Brdu+/NeuN+↑；（3）cAMP/PKA pathway：phospho-PKA↑，phosphor-CREB↑，BDNF↑	p<0.05, p<0.01	—	Fluoxetine,10 mg/kg
Lee，2013[19]	Baicalein	restraint-stressed	SD rats（male，6/6）	—	260-280g	Baicalein（10，20,40mg/kg/d）for 2W+restraint-stressed for 2W	Saline+restraint-stressed for 2w	intragastric	（1）Body weight↑；（2）Behavioral test:FST↓, OFT；（3）paraventricular nucleus：CRF↓，TH↑；（4）hippocampus and cortex：DA↑，5-HT↑（4）BDNF mRNA↑	p＜0.05	30 min prior to a daily restraint stress	Fluoxetine,10 mg/kg
Xiong,2011[20]	Baicalein	CMS	SD rats（male，10/10）	—	160-180g	Baicalein（1，2,4mg/kg/d）for 3W+CMS for 3W	vehicle+restraint-stressed for 3w	intragastric	（1）Behavioral test:FST↓，OFT；（2）hippocampus：p-ERK/ERK↑，BDNF↑	p＜0.05	1h prior to the test	imipramine,15 mg/kg
Du，2019[21]	Baicalein	EAP	NOD/ShiLtJ mice（male，10/10）	—	16-19g	Baicalein（100mg/kg/d )for 1W+ rat prostate antigen plus complete Freund’s adju-vant on days 0 and rat prostate antigen plus incomplete Freund’s adjuvant on days 15	Saline+EAP for 1w	intragastric	（1）Behavioral test:OFT↑，EPM，FST↓，TST↓；（2） PCR： TNF-α↓, IL-1β↓, IL-6↓, IL-8↓；（3）Western blot: NF-κB p65↓, p-IκB, IκB↑	p<0.05	_	_
Li,2013[22]	Baicalin	CMS	Wistar rats（male，10/10）	—	180-220g	Baicalin（10，20,40mg/kg/d）for 5W+CMS for 5W	CMS for 5w	intragastric	（1）Body weight↑；（2）Behavioral test:SPT↑；（3）serum corticosterone↓；（4）frontalcortex and hippocampus：a、 COX-2 mRNA↓，b、 COX-2 activity↓，c、PGE2↓	p<0.05, p<0.01	—	Fluoxetine,7 mg/kg
Li,2015[23]	Baicalin	CORT	ICR mice（male，10/10）	—	18-22g	Baicalin（10，20mg/kg/d）for 3W+CORT for 3W	vehicle+CORT for 3w	intragastric	（1）Behavioral test:SPT↑，FST↓；（2）serum corticosterone↓；（3）hippocampus：a、gene expression ：mRNA expression of BDNF and GR↑ 、mRNA expression of SGK1↓，b、 protein expression：BDNF↑、GR↑ 、SGK1↓	p<0.05, p<0.01	30 min prior to the CORT injection	Fluoxetine,20 mg/kg
Yu,2015[24]	Baicalin	OBX	SD rat（male，15/15）	10% chloral hydrate	180-220g	Baicalin（20,40mg/kg/d）for 2W+OBX for 2W	OBX for 2W	—	（1）Behavioral test:FST↓；（2）hippocampus:SOD↓, MDA↓ ,GSH↑；（3）Immunohistochemistry:SYP↑；（4）Apoptosis quantification：TUNEL-positive cells↓ ；（5） Apaf-1 caspase-3↓，caspase-9↓	p<0.05, p<0.01	—	amitriptyline,10 mg/kg
Zhong，2019[25]	Baicalin	CUMS	C57BL/6 mice（male，8/8）	—	—	Baicalin（25,50mg/kg/d）for 6W+CUMS for 6W	Saline+CUMS for 6w	intragastric	（1）Behavioral test:SPT↑，OFT↑,TST↓,FST↓；（2）proinflammatory cytokines: IL-1b↓, IL-6↓, TNF-a↓ ；（3）NR2B-ERK signaling pathway: NR2B↓ ,CaMKII↓, P-ERK1/2↑；（4）PC12 cells:a、cell viability↑，b、 IL-1b↓、 IL-6↓、 TNF-a↓，c、 Ca2+↓ 、ROS↓，d、NR2B↓、CaMKII↓、 P-ERK1/2↑	p<0.05, p<0.01	—	Fluoxetine,20 mg/kg

## Sheet: Sheet2
First author, year	peer reviewed publication	control of temperature	random allocation to groups	blinded induction of depression	blinded assessment of behavioral outcome	use of anesthetic without significant intrinsic neuroprotective activity	calculation of the sample size necessary to achieve sufficient power	appropriate animal model which uses animals without relevant comorbidities (aged,diabetic, or hypertensive)	compliance with animal welfare Regulations	statement of potential conflict of interests	Quality score
Jia,2021[13]	1	1	1	0	1	0	0	1	1	1	7
Zhao，2021[14]	1	1	1	0	1	0	0	1	1	1	7
Zhao,2020[15]	1	1	0	0	1	0	0	1	1	1	6
Zhang，2019a[16]	1	1	1	0	1	0	0	1	1	1	7
Zhang，2019b[17]	1	1	1	0	1	0	0	1	1	1	7
Zhang，2018[18]	1	1	1	0	1	0	0	1	1	1	7
Lee，2013[19]	1	1	1	0	1	0	0	1	1	1	7
Xiong,2011[20]	1	1	1	0	1	0	0	1	1	1	7
Du，2019[21]	1	1	1	0	1	0	0	0	1	1	6
Li,2013[22]	1	1	0	0	1	0	0	1	1	1	6
Li,2015[23]	1	1	0	0	1	0	0	1	1	1	6
Yu,2015[24]	1	1	0	0	1	0	0	1	1	1	6
Zhong，2019[25]	1	1	1	0	1	0	0	1	1	1	7

## Sheet: Sheet3
Study	Intervention	Depression model	Animal Species	anesthetic	Weigh	Experimental group	Control group		administration route	Outcome	Intergroup difference	Time of administration	Positive drug control
Jia,2021[13]	Baicalin	CUMS	ICR mice（male，10/10）	—	22-26g	Baicalin（25、50 mg/kg/d）for 3W+CUMS for 6W	Saline+CUMS for 6w	hippocampus	intragastric	（1）Behavioral test:SPT，OFT,MWM, TST, NSF；（2）Body weight↑；（3）hippocampus：a、p-ERK/ERK↑、 p-CREB/CREB↑，b、 real-time PCR： ERK mRNA↑、CREB mRNA↑，c、immunofluorescence in the CA1、CA3 and DG： p-ERK↑ 、p-CREB↑	p＜0.05	—	Fluoxetine,10 mg/kg
Zhao，2021[14]	Baicalein	rotenone-induced mice model	C57BL/6J mice（male，10/12）	—	20-22g	Baicalein（300mg/kg/d）for 4W+rotenone-induced for 2W	Saline+rotenone-induced for 2W	hippocampus，striatum，cortex，midbrain，brain stem	intragastric	（1）Behavioral test:SPT↑，OFT↑,RT↑, TST↓；（2）striatum：α-synuclein↓；（3）neuroinflammation：a、midbrain：IFN-γ↓,IL-4↓,IL-12↓,IL-6↓，b、plasma： IL-1β↓，IL-4↓，IL-5↓，IL-10↓，IL-12↓；（4）monoamine neurotransmitters：a、 cortex：DA↑、 DOPAC↑、HVA↑、5-HT↑、5-HIAA↑、NE↑， b、striatum：DA↑、 DOPAC↑、HVA↑、5-HT↑，c、 brain stem：NE↑、5-HT↑；（5）BDNF/ TrkB/CREB pathway in the hippocampus：PSD95↓、SYP↓，BDNF↑、TrkB↑、CREB↑，PI3K↓、Akt↓、CaMK II↓	p<0.05, p<0.01	—	madopar,50 mg/kg
Zhao,2020[15]	Baicalin	CORT	C57BL/6J mice（female，10/10）	—	18-22g	Baicalin（30、60mg/kg/d）for 6W+CORT for 3W	Saline+CORT for 3W	hippocampus	intragastric	（1）Behavioral test:SPT↑，OFT↑，FST↓, TST↓， NSF↑；（2）Hippocampal dentate gyrus：Ki-67 positive cells↑， BrdU cells↑， DCX+/NeuN+/BrdU+ cells↑， DCX-/NeuN+/BrdU+ cells↑；（3） PI3K/AKT/GSK3b/b-catenin pathway： p-PI3K↑, p-AKT↑, p-GSK-3b↑ ，b-catenin↑，PSD95↑ ，Synaptophysin 1↑	p＜0.05	30minprior to the corticosterone injection	Escitalopram,10 mg/kg
Zhang，2019a[16]	Baicalin	CORT，40 mg/kg	C57BL/6 male（male，15/15）	—	18-22g	Baicalin（40、80、160mg/kg/d）for 4W+CORT for 8W	CORT for 8W	Hypothalamus	intragastric	（1）Behavioral test:FST↓, TST↓，elevated plus maze test↑；（2）DEX-induced corticosterone suppression↑；（3）nuclear GR↓， cytoplasmic pGR S203↓，cytoplasmic pGR S211↓	p<0.05, p<0.01	30minprior to the corticosterone injection	Fluoxetine,18 mg/kg
Zhang，2019b[17]	Baicalin	CUMS	ICR mice（male，10/10）	—	23-26g	Baicalin（60 mg/kg/d）for 3W+CUMS for 6W	Saline+CUMS for 6w	hippocampus	intragastric	（1）Behavioral test:SPT↑，OFT↑,TST↓；（2）dendritic morphology and hippocampal neurogenesis：DCX+ cells↑， dendritic intersections of neurons in the DG↑，the AOD of BrdU+/NeuN+↑；（3）Akt/FOXG1 pathway：p-Akt/Akt↑, FOXG1↑，FGF2↑	p＜0.01	—	Fluoxetine,15 mg/kg
Zhang，2018[18]	Radix Scutellariae	CUMS	SD rats（male，10/10）	—	190-220g	Radix Scutellariae（500、1000 mg/kg/d）for 3W+CUMS for 6W	CUMS for 6W	hippocampus	intragastric	（1）Behavioral test:SPT↑，OFT↑,FST↓，MWM↑；（2）hippocampus dentate gyrus：Brdu+↑，DCX+↑，NeuN+↑，Brdu+/NeuN+↑；（3）cAMP/PKA pathway：phospho-PKA↑，phosphor-CREB↑，BDNF↑	p<0.05, p<0.01	—	Fluoxetine,10 mg/kg
Lee，2013[19]	Baicalein	restraint-stressed	SD rats（male，6/6）	—	260-280g	Baicalein（10，20,40mg/kg/d）for 2W+restraint-stressed for 2W	Saline+restraint-stressed for 2w	paraventricular nucleus，hippocampus ，cortex	intragastric	（1）Body weight↑；（2）Behavioral test:FST↓, OFT；（3）paraventricular nucleus：CRF↓，TH↑；（4）hippocampus and cortex：DA↑，5-HT↑（4）BDNF mRNA↑	p＜0.05	30 min prior to a daily restraint stress	Fluoxetine,10 mg/kg
Xiong,2011[20]	Baicalein	CMS	SD rats（male，10/10）	—	160-180g	Baicalein（1，2,4mg/kg/d）for 3W+CMS for 3W	vehicle+restraint-stressed for 3w	hippocampus	intragastric	（1）Behavioral test:FST↓，OFT；（2）hippocampus：p-ERK/ERK↑，BDNF↑	p＜0.05	1h prior to the test	imipramine,15 mg/kg
Du，2019[21]	Baicalein	EAP	NOD/ShiLtJ mice（male，10/10）	—	16-19g	Baicalein（100mg/kg/d )for 1W+ rat prostate antigen plus complete Freund’s adju-vant on days 0 and rat prostate antigen plus incomplete Freund’s adjuvant on days 15	Saline+EAP for 1w	hippocampus	intragastric	（1）Behavioral test:OFT↑，EPM，FST↓，TST↓；（2） PCR： TNF-α↓, IL-1β↓, IL-6↓, IL-8↓；（3）Western blot: NF-κB p65↓, p-IκB, IκB↑	p<0.05	_	_
Li,2013[22]	Baicalin	CMS	Wistar rats（male，10/10）	—	180-220g	Baicalin（10，20,40mg/kg/d）for 5W+CMS for 5W	CMS for 5w	frontalcortex，hippocampus	intragastric	（1）Body weight↑；（2）Behavioral test:SPT↑；（3）serum corticosterone↓；（4）frontalcortex and hippocampus：a、 COX-2 mRNA↓，b、 COX-2 activity↓，c、PGE2↓	p<0.05, p<0.01	—	Fluoxetine,7 mg/kg
Li,2015[23]	Baicalin	CORT	ICR mice（male，10/10）	—	18-22g	Baicalin（10，20mg/kg/d）for 3W+CORT for 3W	vehicle+CORT for 3w	hippocampus	intragastric	（1）Behavioral test:SPT↑，FST↓；（2）serum corticosterone↓；（3）hippocampus：a、gene expression ：mRNA expression of BDNF and GR↑ 、mRNA expression of SGK1↓，b、 protein expression：BDNF↑、GR↑ 、SGK1↓	p<0.05, p<0.01	30 min prior to the CORT injection	Fluoxetine,20 mg/kg
Yu,2014	Baicalin	CUMS	SD rat（male，8/8）	—	180-220g	Baicalin（20,40mg/kg/d）for 6W+CUMS for 6W	CUMS for 6w	hippocampus	intragastric	（1）Behavioral test:SPT↑；（2）serum cortico-sterone↓；（3）hippocampus: bcl-2↑, bax↓ ,caspase-3↓,BDNF↑；（4）GluR2 mRNA↑	p＜0.05		Fluoxetine,10 mg/kg
Yu,2015[24]	Baicalin	OBX	SD rat（male，15/15）	10% chloral hydrate	180-220g	Baicalin（20,40mg/kg/d）for 2W+OBX for 2W	OBX for 2W	hippocampus	—	（1）Behavioral test:FST↓；（2）hippocampus:SOD↓, MDA↓ ,GSH↑；（3）Immunohistochemistry:SYP↑；（4）Apoptosis quantification：TUNEL-positive cells↓ ；（5） Apaf-1 caspase-3↓，caspase-9↓	p<0.05, p<0.01	—	amitriptyline,10 mg/kg
Zhong，2019[25]	Baicalin	CUMS	C57BL/6 mice（male，8/8）	—	—	Baicalin（25,50mg/kg/d）for 6W+CUMS for 6W	Saline+CUMS for 6w	hippocampus	intragastric	（1）Behavioral test:SPT↑，OFT↑,TST↓,FST↓；（2）proinflammatory cytokines: IL-1b↓, IL-6↓, TNF-a↓ ；（3）NR2B-ERK signaling pathway: NR2B↓ ,CaMKII↓, P-ERK1/2↑；（4）PC12 cells:a、cell viability↑，b、 IL-1b↓、 IL-6↓、 TNF-a↓，c、 Ca2+↓ 、ROS↓，d、NR2B↓、CaMKII↓、 P-ERK1/2↑	p<0.05, p<0.01	—	Fluoxetine,20 mg/kg
