# Supplementary material for: The effect of scutellaria baicalensis and its active ingredients on major depressive disorder: a systematic review and meta-analysis of literature in pre-clinical research
Source: Front Pharmacol. 2024 Mar 20;15:1313871. doi: 10.3389/fphar.2024.1313871 (PMC10987764; doi:10.3389/fphar.2024.1313871)
Supplement: Supplementary file 2 [file Table2.xls]

## Sheet: SPT
研究	平均值	方差	试验组总人数	平均值	方差	对照组总人数
Jia,2021	81.0778	1.12608	10	83.33	2.25216	10
Zhao，2021	69.2264	1.53836	10	84.61	1.53836	12
Zhao,2020	78.9498	2.20325	10	88.13	1.83604	10
Zhang，2019b	82.1967	5.59161	10	86.67	1.3979	10
Zhang，2018	93.7185	0.142864	10	94.29	0.142864	10
Li,2013	79.8658	6.78106	10	85.14	7.53451	10
Li,2015	67.0558	5.88	10	78.82	8.23	10
Zhong,2019	62.3373	5.47	8	84.21	4.37	8

## Sheet: OFT
研究	平均值	方差	试验组总人数	平均值	方差	对照组总人数
Jia,2021	47.5	5	10	67.5	5	10
Zhao,2020	42.0855	3.79149	10	44.55	3.79149	10
Zhang，2019b	85.1857	5.40862	10	87.89	4.05646	10
Zhang，2018	37.4267	6.015	10	40.1	6.68333	10
Lee，2013	953.763	70.6491	6	1236.36	123.636	6
Xiong,2011	33.5287	2.39491	10	42.31	1.5966	10
Zhao，2021	65.9085	6.81813	10	109.09	9.09083	12
Du，2019	32.3035	4.61	10	35.38	4.61	10
Zhong,2019	75.22	4.90583	8	117.74	8.18	8

## Sheet: MWM
研究	平均值	方差	试验组总人数	平均值	方差	对照组总人数
Jia,2021	5.1	0.8925	10	6.63	0.9435	10
Zhang，2018	4.77548	0.290303	6	4.79	0.50803	6

## Sheet: TST
研究	平均值	方差	试验组总人数	平均值	方差	对照组总人数
Jia,2021	77.56	14.404	10	52.63	11.08	10
Zhao，2021	91.9125	4.902	10	73.53	9.19125	12
Zhao,2020	65.9769	3.66538	10	47.65	3.66538	10
Zhang，2019a	123.25	8.5	15	136	4.25	15
Zhang，2019b	40	7.2	10	24	6	10
Du，2019	36.9143	6.92	10	32.3	6.92	10
Zhong,2019	77.424	8.07	8	48.39	6.45	8

## Sheet: NSFT
研究	平均值	方差	试验组总人数	平均值	方差	对照组总人数
Jia,2021	0.168649	0.0210811	10	0.26	0.0351351	10
Zhao,2020	0.69	0.09	10	1	0.09	10

## Sheet: FST
研究	平均值	方差	试验组总人数	平均值	方差	对照组总人数
Zhang，2019a	131.75	8.5	15	136	4.25	15
Zhang，2018	6.4	1.6	10	5.6	2.4	10
Lee，2013	29.7354	4.41385	6	30.2	4.64615	6
Xiong,2011	81.25	18.75	10	75	22.9167	10
Du，2019	89.3444	4.06111	10	73.1	12.18	10
Li，2015	42.855	5.71	10	57.14	11.43	10
Yu，2015	56.3257	20.98	15	67.37	17.67	15
Zhong,2019	87.0975	4.84	8	38.71	6.45	8

## Sheet: Sheet1
	试验组总人数	对照组总人数
Jia,2021	10	10
Zhao，2021	10	12
Zhao,2020	10	10
Zhang，2019b	10	10
Zhang，2018	10	10
Li,2013	10	10
Li,2015	10	10
Zhong,2019	8	8
Lee 2013	6	6
Xiong 2011	10	10
Du 2019	10	10
Zhang 2019a	15	15
Yu 2015	15	15
